# Supplementary material for: From laboratory to community: a perspective on colourimetric membrane sensor technologies for heavy metal monitoring in freshwater
Source: Royal Society of Chemistry journal article supplement (doi:10.1039/d5sd00172b), 2026-01-01
Supplement: d5sd00172b1.pdf [file d5sd00172b1.pdf]

## 1 Supplementary Material S1: Detailed Scoring Criteria and Study Evaluation

2 Each study from Section 3 was evaluated across several key aspects to systematically compare the  
3 performance and suitability of different colourimetric sensor technologies for heavy metal detection  
4 in freshwater. A score colour code was assigned for each variable according to the following criteria:

### 5 1. Analytical Performances

- 6 • Sensitivity / Limit of Detection (LoD):

- 7 • Orange (lowest): LoD values in the ppm range, insufficient for detecting trace heavy  
8 metals.

- 9 • Yellow (average): LoD values approaching the ppb range, but with some limitations in  
10 consistency or reliability.

- 11 • Green (highest): Excellent sensitivity with LoD in the low ppb range, ensuring reliable  
12 trace detection.

- 13 • Selectivity / interferences:

- 14 • Orange: Significant interference from non-target ions with little to no mitigation strategies  
15 reported.

- 16 • Yellow: Moderate interference addressed by partial optimization of the sensor design.

- 17 • Green: High selectivity with robust interference mitigation, ensuring accurate detection  
18 even in complex matrices.

### 19 2. Applicability

- 20 • Response Time:

- 21 • Orange: Response times exceeding 2 hours, which are impractical for real-time  
22 monitoring.

- 23 • Yellow: Response times between 10 minutes and 1 hour, adequate for many applications  
24 but not optimal.

- 25 • Green: Rapid response (<10 minutes) suitable for on-site and real-time monitoring  
26 scenarios.

- 27 • Working pH Range:

- 28 • Orange: The sensor operates outside the typical freshwater pH range (6–8) or no pH  
29 information is provided.

- 30 • Yellow: The sensor functions within a partially overlapping pH range with freshwater

environments.

- Green: The sensor performs optimally within the standard freshwater pH range (6–8).

- Stability and Shelf-life:

- Orange: Short-term stability (e.g., less than 7 days) or requires strict storage conditions.

- Yellow: Moderate stability (7–40 days) under controlled conditions.

- Green: Long-term stability (40–90 days) under room temperature or minimal storage requirements.

### 3. Safety and Environmental Impact

- Chromophore Type:

- Orange: Use of synthetic chromophores known to be toxic or environmentally hazardous.

- Yellow: A mix of synthetic and natural chromophores, with some environmental concerns remaining.

- Green: Use of natural chromophores that are non-toxic and environmentally benign.

- Membrane Composition:

- Orange: Predominantly synthetic materials with low biodegradability.

- Yellow: A combination of bio-based and synthetic materials, offering moderate sustainability.

- Green: Fully bio-based membranes with high biodegradability and minimal environmental impact.

- Immobilization Technique:

- Orange: Reliance on toxic cross-linking agents (e.g., aldehydes) that pose user and environmental risks.

- Yellow: Use of chemical immobilization techniques with moderate safety profiles.

- Green: Employment of green chemistry or physical immobilization methods that minimize toxicity and environmental hazards.

### Study-Specific Evaluation

For every study, each of the above variables has been assigned a score along with detailed annotations justifying the score. For example:

- *Study A* was assigned:

- Sensitivity: Green (due to an LoD in the low ppb range),

- Selectivity: Green (demonstrating robust interference mitigation),

- 62 • Response Time: Green (with a response time of less than 10 minutes),
- 63 • pH Range: Green (optimal performance within pH 6–8),
- 64 • Stability: Yellow (moderate stability under controlled conditions),
- 65 • Chromophore Type: Yellow (mixed use of synthetic and natural chromophores),
- 66 • Membrane Composition: Green (fully bio-based), and
- 67 • Immobilization Technique: Yellow (chemical methods with moderate safety).
- 68 • *Study B* received:
- 69 • Response Time: Yellow (with response times between 10 and 60 minutes),
- 70 • Working pH Range: Green (optimal within the 6–8 range), and
- 71 • Immobilization Technique: Orange (due to the use of toxic cross-linkers), among other
- 72 variable scores.

73 This supplementary material offers a transparent and reproducible framework for comparing sensor  
74 technologies, highlighting areas where improvements are needed and identifying the most promising  
75 approaches for community-based heavy metal monitoring in freshwater environments.
